# Supplementary material for: Detection of Structural Variations and Fusion Genes in Breast Cancer Samples Using Third-Generation Sequencing
Source: Front Cell Dev Biol. 2022 Apr 13;10:854640. doi: 10.3389/fcell.2022.854640 (PMC9043247; doi:10.3389/fcell.2022.854640)
Supplement: Supplementary file 1 [file Table2.XLSX]

## Sheet: 比对结果统计
	RM65B	RM65P	RM65T	RM70B	RM70P	RM70T	RM74B	RM74P	RM74T	RM77P	RM62B	RM62T	RM63T	RM64B	RM64P	RM64T	RM66P	RM67B	RM67P	RM67T	RM68P	RM69B	RM69P	RM69T	RM71B	RM71P	RM71T	RM72B	RM72P	RM72T	RM73B	RM73P	RM73T	RM75B	RM75P	RM75T	RM76B	RM76P	RM76T	RM78B	RM78P	RM78T	RM79B	RM79T	RM80B	RM80P	RM80T	RM82P	RMH12
[Total] Raw Reads (All reads)	125106	136652	105097	87113	176489	114711	151086	163265	116096	146485	201035	274721	255109	199440	119233	256306	255392	161487	254560	173591	237255	160479	213975	176029	171054	232518	199089	141181	223959	186575	154367	220267	234199	194810	217895	176034	113691	318888	204490	226722	263058	116298	197832	124002	140473	269210	168544	158261	146781
[Total] Raw Data(Mb)	416.37	485.82	367.28	305.28	616.08	383.69	529.21	572.86	403.13	503.91	608.64	914.70	834.01	563.63	359.97	830.45	799.09	459.16	815.81	575.72	759.58	472.31	677.85	549.87	529.81	747.70	636.11	432.60	724.50	595.88	473.57	722.79	754.30	566.70	742.96	552.68	331.10	1027.63	610.71	654.72	841.71	321.46	580.64	381.48	430.13	804.97	515.87	476.66	462.95
[Total] Mapped Reads	123491	135451	104159	86210	175027	113745	149787	161707	115069	144267	199041	272269	253042	197629	118250	254340	253264	159868	252827	172344	235532	158108	212041	174429	169782	230899	197462	139944	222412	185114	153197	218665	232204	192989	216664	174617	112527	316425	202098	224882	261356	114096	196141	122990	139242	266601	166791	156909	145431
[Total] Fraction of Mapped Reads	98.71%	99.12%	99.11%	98.96%	99.17%	99.16%	99.14%	99.05%	99.12%	98.49%	99.01%	99.11%	99.19%	99.09%	99.18%	99.23%	99.17%	99.00%	99.32%	99.28%	99.27%	98.52%	99.10%	99.09%	99.26%	99.30%	99.18%	99.12%	99.31%	99.22%	99.24%	99.27%	99.15%	99.07%	99.44%	99.20%	98.98%	99.23%	98.83%	99.19%	99.35%	98.11%	99.15%	99.18%	99.12%	99.03%	98.96%	99.15%	99.08%
[Total] Mapped Data(Mb)	410.97	481.66	363.94	302.11	610.94	380.22	524.66	567.35	399.53	496.26	602.88	906.68	827.04	558.53	357.03	823.78	792.41	454.57	810.19	571.57	754.18	465.86	671.85	544.93	525.89	742.48	630.91	428.85	719.53	591.13	470.00	717.69	747.86	561.43	738.81	548.08	327.77	1019.95	603.99	649.33	836.26	315.79	575.57	378.24	426.39	796.84	510.52	472.46	458.64
[Total] Fraction of Mapped Data(Mb)	98.70%	99.15%	99.09%	98.96%	99.17%	99.10%	99.14%	99.04%	99.11%	98.48%	99.05%	99.12%	99.17%	99.10%	99.18%	99.20%	99.16%	99.00%	99.31%	99.28%	99.29%	98.63%	99.11%	99.10%	99.26%	99.30%	99.18%	99.13%	99.31%	99.20%	99.24%	99.29%	99.15%	99.07%	99.44%	99.17%	98.99%	99.25%	98.90%	99.18%	99.35%	98.24%	99.13%	99.15%	99.13%	98.99%	98.96%	99.12%	99.07%
[Total] forward strand reads	61370	67705	51797	42874	87603	56973	74906	80869	57646	72142	99536	135807	126767	98466	59412	126489	126301	79852	126064	86142	117994	78901	106199	86888	85268	114960	98534	69762	111478	92541	76949	109374	115740	95859	108300	87074	56300	157865	100698	112227	130438	56744	98050	61361	69552	133042	83253	78115	72510
[Total] backward strand reads	62121	67746	52362	43336	87424	56772	74881	80838	57423	72125	99505	136462	126275	99163	58838	127851	126963	80016	126763	86202	117538	79207	105842	87541	84514	115939	98928	70182	110934	92573	76248	109291	116464	97130	108364	87543	56227	158560	101400	112655	130918	57352	98091	61629	69690	133559	83538	78794	72921
[Total] Map quality cutoff value	20	20	20	20	20	20	20	20	20	20	20	20	20	20	20	20	20	20	20	20	20	20	20	20	20	20	20	20	20	20	20	20	20	20	20	20	20	20	20	20	20	20	20	20	20	20	20	20	20
[Total] MapQuality above cutoff reads	122887	134308	103270	85541	173301	112414	148305	160393	113781	144191	197683	269798	250075	196170	116915	251475	251490	159232	250768	170690	232912	157956	210574	173096	167780	228346	195651	138745	220089	183095	151399	215865	229118	191370	214120	172919	111629	313430	200962	222403	258596	114163	194255	122143	137766	264525	165885	155321	144157
[Total] Fraction of MapQ reads in all reads	98.23%	98.28%	98.26%	98.20%	98.19%	98.00%	98.16%	98.24%	98.01%	98.43%	98.33%	98.21%	98.03%	98.36%	98.06%	98.12%	98.47%	98.60%	98.51%	98.33%	98.17%	98.43%	98.41%	98.33%	98.09%	98.21%	98.27%	98.27%	98.27%	98.13%	98.08%	98.00%	97.83%	98.23%	98.27%	98.23%	98.19%	98.29%	98.27%	98.10%	98.30%	98.16%	98.19%	98.50%	98.07%	98.26%	98.42%	98.14%	98.21%
[Total] Fraction of MapQ reads in mapped reads	99.51%	99.16%	99.15%	99.22%	99.01%	98.83%	99.01%	99.19%	98.88%	99.95%	99.32%	99.09%	98.83%	99.26%	98.87%	98.87%	99.30%	99.60%	99.19%	99.04%	98.89%	99.90%	99.31%	99.24%	98.82%	98.89%	99.08%	99.14%	98.96%	98.91%	98.83%	98.72%	98.67%	99.16%	98.83%	99.03%	99.20%	99.05%	99.44%	98.90%	98.94%	100.06%	99.04%	99.31%	98.94%	99.22%	99.46%	98.99%	99.12%
[Target] Target Reads	69174	77837	60722	48738	101254	65546	84567	93907	66841	79410	117105	165684	152439	121217	73295	151557	157190	99522	157804	102340	147016	88529	129353	101336	103351	144070	125031	86006	140176	112709	93913	137152	137716	117644	136314	104003	67591	194964	122632	138468	163845	69179	121399	76240	86057	157917	109176	96357	83295
[Target] Fraction of Target Reads in all reads	55.29%	56.96%	57.78%	55.95%	57.37%	57.14%	55.97%	57.52%	57.57%	54.21%	58.25%	60.31%	59.75%	60.78%	61.47%	59.13%	61.55%	61.63%	61.99%	58.95%	61.97%	55.17%	60.45%	57.57%	60.42%	61.96%	62.80%	60.92%	62.59%	60.41%	60.84%	62.27%	58.80%	60.39%	62.56%	59.08%	59.45%	61.14%	59.97%	61.07%	62.28%	59.48%	61.36%	61.48%	61.26%	58.66%	64.78%	60.88%	56.75%
[Target] Fraction of Target Reads in mapped reads	56.02%	57.47%	58.30%	56.53%	57.85%	57.63%	56.46%	58.07%	58.09%	55.04%	58.83%	60.85%	60.24%	61.34%	61.98%	59.59%	62.07%	62.25%	62.42%	59.38%	62.42%	55.99%	61.00%	58.10%	60.87%	62.40%	63.32%	61.46%	63.03%	60.89%	61.30%	62.72%	59.31%	60.96%	62.91%	59.56%	60.07%	61.61%	60.68%	61.57%	62.69%	60.63%	61.89%	61.99%	61.80%	59.23%	65.46%	61.41%	57.27%
[Target] Target Data(Mb)	229.66	276.74	211.25	170.37	353.11	218.04	295.30	329.46	231.73	271.92	357.26	545.27	492.41	342.35	220.67	485.73	490.39	283.17	502.91	336.24	468.02	262.57	407.77	314.10	319.23	461.26	392.86	263.33	453.36	357.34	287.17	449.29	440.18	341.78	464.68	323.93	197.43	626.14	364.27	398.20	523.49	191.19	354.70	232.82	262.55	468.14	331.80	288.06	260.60
[Target] Target Data Rmdup(Mb)	229.36	276.40	211.01	170.13	352.68	217.78	294.97	329.06	231.47	271.60	356.87	544.73	491.85	341.97	220.42	485.22	489.85	282.88	502.44	335.91	467.50	262.25	407.35	313.80	318.88	460.77	392.51	263.07	452.90	357.03	286.84	448.77	439.74	341.34	464.08	323.56	197.18	625.37	363.90	397.76	522.97	191.01	354.30	232.58	262.26	467.63	331.47	287.75	260.34
[Target] Fraction of Target Data in all data	55.16%	56.96%	57.52%	55.81%	57.32%	56.83%	55.80%	57.51%	57.48%	53.96%	58.70%	59.61%	59.04%	60.74%	61.30%	58.49%	61.37%	61.67%	61.65%	58.40%	61.62%	55.59%	60.16%	57.12%	60.25%	61.69%	61.76%	60.87%	62.58%	59.97%	60.64%	62.16%	58.36%	60.31%	62.55%	58.61%	59.63%	60.93%	59.65%	60.82%	62.19%	59.47%	61.09%	61.03%	61.04%	58.16%	64.32%	60.43%	56.29%
[Target] Fraction of Target Data in mapped data	55.88%	57.45%	58.05%	56.39%	57.80%	57.34%	56.28%	58.07%	58.00%	54.79%	59.26%	60.14%	59.54%	61.29%	61.81%	58.96%	61.89%	62.29%	62.07%	58.83%	62.06%	56.36%	60.69%	57.64%	60.70%	62.12%	62.27%	61.40%	63.01%	60.45%	61.10%	62.60%	58.86%	60.88%	62.90%	59.10%	60.24%	61.39%	60.31%	61.33%	62.60%	60.54%	61.63%	61.55%	61.58%	58.75%	64.99%	60.97%	56.82%
[Target] Len of region	4924610	4924610	4924610	4924610	4924610	4924610	4924610	4924610	4924610	4924610	4924610	4924610	4924610	4924610	4924610	4924610	4924610	4924610	4924610	4924610	4924610	4924610	4924610	4924610	4924610	4924610	4924610	4924610	4924610	4924610	4924610	4924610	4924610	4924610	4924610	4924610	4924610	4924610	4924610	4924610	4924610	4924610	4924610	4924610	4924610	4924610	4924610	4924610	4924610
[Target] Average depth	46.63	56.19	42.90	34.59	71.70	44.28	59.96	66.90	47.06	55.22	72.55	110.72	99.99	69.52	44.81	98.63	99.58	57.50	102.12	68.28	95.04	53.32	82.80	63.78	64.82	93.66	79.77	53.47	92.06	72.56	58.31	91.23	89.38	69.40	94.36	65.78	40.09	127.15	73.97	80.86	106.30	38.82	72.03	47.28	53.31	95.06	67.38	58.49	52.92
[Target] Coverage (>0x)	99.76%	99.80%	99.56%	99.71%	99.78%	99.69%	99.82%	99.83%	99.64%	99.73%	99.75%	99.92%	99.88%	99.73%	99.60%	99.82%	99.91%	99.76%	99.87%	99.82%	99.81%	99.75%	99.87%	99.79%	99.87%	99.88%	99.90%	99.78%	99.86%	99.83%	99.85%	99.82%	99.89%	99.76%	99.92%	99.81%	99.61%	99.90%	99.77%	99.82%	99.83%	99.65%	99.83%	99.73%	99.87%	99.83%	99.76%	99.63%	99.69%
[Target] Coverage (>=4x)	98.87%	99.19%	98.76%	98.67%	99.35%	98.70%	99.33%	99.39%	98.83%	99.09%	99.36%	99.77%	99.54%	99.07%	98.67%	99.54%	99.51%	98.91%	99.45%	99.33%	99.49%	99.17%	99.43%	99.29%	99.40%	99.37%	99.40%	99.22%	99.48%	99.33%	99.16%	99.38%	99.52%	99.28%	99.49%	99.40%	98.56%	99.58%	99.31%	99.28%	99.45%	98.74%	99.24%	98.82%	99.09%	99.46%	99.22%	99.08%	99.03%
[Target] Coverage (>=10x)	97.06%	98.08%	96.37%	95.58%	98.41%	96.24%	98.10%	98.30%	96.68%	97.56%	98.31%	99.05%	98.76%	97.98%	96.24%	98.98%	98.79%	97.18%	98.64%	98.29%	98.64%	97.74%	98.45%	98.04%	98.25%	98.64%	98.38%	97.52%	98.76%	98.36%	97.75%	98.63%	98.77%	98.26%	98.87%	98.38%	95.83%	99.04%	98.31%	98.12%	98.86%	95.96%	98.02%	96.53%	96.94%	98.75%	97.83%	97.61%	97.45%
[Target] Coverage (>=30x)	82.24%	88.43%	77.73%	66.92%	92.42%	79.27%	89.03%	91.85%	80.92%	87.21%	93.44%	95.00%	94.33%	91.56%	79.76%	94.85%	95.11%	86.05%	94.79%	90.77%	94.46%	84.20%	93.25%	89.31%	90.06%	94.10%	90.69%	86.42%	94.82%	90.51%	88.06%	94.92%	93.75%	91.69%	95.34%	90.33%	76.14%	97.06%	90.96%	92.20%	95.76%	72.12%	90.32%	79.77%	83.98%	95.09%	87.68%	87.86%	86.20%
[Target] Coverage (>=100x)	0.00%	0.43%	0.00%	0.00%	12.48%	0.01%	2.27%	6.75%	0.11%	1.32%	14.83%	61.03%	46.49%	10.25%	0.08%	48.17%	54.70%	1.93%	56.23%	10.73%	48.73%	5.12%	31.25%	7.28%	6.76%	48.70%	19.63%	0.52%	45.10%	21.53%	1.85%	43.24%	39.32%	10.53%	47.70%	8.30%	0.00%	75.24%	16.36%	30.51%	61.73%	0.71%	16.15%	2.07%	0.70%	49.45%	10.52%	2.06%	0.47%
[Target] Target Region Count	28	28	28	28	28	28	28	28	28	28	28	28	28	28	28	28	28	28	28	28	28	28	28	28	28	28	28	28	28	28	28	28	28	28	28	28	28	28	28	28	28	28	28	28	28	28	28	28	28
[Target] Region covered > 0x	28	28	28	28	28	28	28	28	28	28	28	28	28	28	28	28	28	28	28	28	28	28	28	28	28	28	28	28	28	28	28	28	28	28	28	28	28	28	28	28	28	28	28	28	28	28	28	28	28
[Target] Fraction Region covered > 0x	100.00%	100.00%	100.00%	100.00%	100.00%	100.00%	100.00%	100.00%	100.00%	100.00%	100.00%	100.00%	100.00%	100.00%	100.00%	100.00%	100.00%	100.00%	100.00%	100.00%	100.00%	100.00%	100.00%	100.00%	100.00%	100.00%	100.00%	100.00%	100.00%	100.00%	100.00%	100.00%	100.00%	100.00%	100.00%	100.00%	100.00%	100.00%	100.00%	100.00%	100.00%	100.00%	100.00%	100.00%	100.00%	100.00%	100.00%	100.00%	100.00%
[Target] Fraction Region covered >= 4x	100.00%	100.00%	100.00%	100.00%	100.00%	100.00%	100.00%	100.00%	100.00%	100.00%	100.00%	100.00%	100.00%	100.00%	100.00%	100.00%	100.00%	100.00%	100.00%	100.00%	100.00%	100.00%	100.00%	100.00%	100.00%	100.00%	100.00%	100.00%	100.00%	100.00%	100.00%	100.00%	100.00%	100.00%	100.00%	100.00%	100.00%	100.00%	100.00%	100.00%	100.00%	100.00%	100.00%	100.00%	100.00%	100.00%	100.00%	100.00%	100.00%
[Target] Fraction Region covered >= 10x	100.00%	100.00%	100.00%	100.00%	100.00%	100.00%	100.00%	100.00%	100.00%	100.00%	100.00%	100.00%	100.00%	100.00%	100.00%	100.00%	100.00%	100.00%	100.00%	100.00%	100.00%	100.00%	100.00%	100.00%	100.00%	100.00%	100.00%	100.00%	100.00%	100.00%	100.00%	100.00%	100.00%	100.00%	100.00%	100.00%	100.00%	100.00%	100.00%	100.00%	100.00%	100.00%	100.00%	100.00%	100.00%	100.00%	100.00%	100.00%	100.00%
[Target] Fraction Region covered >= 30x	82.14%	92.86%	71.43%	50.00%	96.43%	75.00%	96.43%	96.43%	78.57%	96.43%	100.00%	100.00%	100.00%	96.43%	78.57%	100.00%	100.00%	96.43%	100.00%	96.43%	100.00%	100.00%	100.00%	96.43%	96.43%	100.00%	92.86%	89.29%	100.00%	96.43%	96.43%	100.00%	100.00%	96.43%	100.00%	96.43%	75.00%	100.00%	100.00%	96.43%	100.00%	60.71%	96.43%	64.29%	85.71%	100.00%	89.29%	89.29%	92.86%
[Target] Fraction Region covered >= 100x	0.00%	0.00%	0.00%	0.00%	0.00%	0.00%	0.00%	0.00%	0.00%	0.00%	3.57%	46.43%	32.14%	0.00%	0.00%	46.43%	39.29%	0.00%	39.29%	3.57%	25.00%	0.00%	17.86%	7.14%	0.00%	21.43%	10.71%	0.00%	17.86%	7.14%	0.00%	21.43%	25.00%	0.00%	21.43%	0.00%	0.00%	82.14%	7.14%	3.57%	50.00%	3.57%	0.00%	0.00%	0.00%	21.43%	7.14%	0.00%	0.00%
[flank] flank size	2000	2000	2000	2000	2000	2000	2000	2000	2000	2000	2000	2000	2000	2000	2000	2000	2000	2000	2000	2000	2000	2000	2000	2000	2000	2000	2000	2000	2000	2000	2000	2000	2000	2000	2000	2000	2000	2000	2000	2000	2000	2000	2000	2000	2000	2000	2000	2000	2000
[flank] Len of region (not include target region)	82000	82000	82000	82000	82000	82000	82000	82000	82000	82000	82000	82000	82000	82000	82000	82000	82000	82000	82000	82000	82000	82000	82000	82000	82000	82000	82000	82000	82000	82000	82000	82000	82000	82000	82000	82000	82000	82000	82000	82000	82000	82000	82000	82000	82000	82000	82000	82000	82000
[flank] Average depth	22.94	26.76	19.20	15.86	33.69	20.04	28.96	29.47	21.95	31.04	41.68	70.12	68.60	33.89	22.51	50.05	49.90	28.64	51.92	34.55	48.77	34.23	45.25	31.95	30.15	46.87	68.29	25.51	46.15	32.23	27.51	45.38	41.65	32.63	47.83	30.29	20.71	70.72	39.08	40.75	53.56	20.45	35.09	20.54	24.91	45.82	27.95	27.07	26.69
[flank] flank Reads	1549	1809	1331	1082	2313	1397	1951	2023	1452	2060	2983	4708	4714	2548	1610	3458	3479	2082	3666	2363	3386	2597	3189	2207	2164	3268	4675	1844	3260	2294	1977	3151	2867	2386	3242	2121	1495	4935	2822	2974	3804	1494	2538	1470	1794	3289	2013	1942	1877
[flank] Fraction of flank Reads in all reads	1.24%	1.32%	1.27%	1.24%	1.31%	1.22%	1.29%	1.24%	1.25%	1.41%	1.48%	1.71%	1.85%	1.28%	1.35%	1.35%	1.36%	1.29%	1.44%	1.36%	1.43%	1.62%	1.49%	1.25%	1.27%	1.41%	2.35%	1.31%	1.46%	1.23%	1.28%	1.43%	1.22%	1.22%	1.49%	1.20%	1.31%	1.55%	1.38%	1.31%	1.45%	1.28%	1.28%	1.19%	1.28%	1.22%	1.19%	1.23%	1.28%
[flank] Fraction of flank Reads in mapped reads	1.25%	1.34%	1.28%	1.26%	1.32%	1.23%	1.30%	1.25%	1.26%	1.43%	1.50%	1.73%	1.86%	1.29%	1.36%	1.36%	1.37%	1.30%	1.45%	1.37%	1.44%	1.64%	1.50%	1.27%	1.27%	1.42%	2.37%	1.32%	1.47%	1.24%	1.29%	1.44%	1.23%	1.24%	1.50%	1.21%	1.33%	1.56%	1.40%	1.32%	1.46%	1.31%	1.29%	1.20%	1.29%	1.23%	1.21%	1.24%	1.29%
[flank] flank Data(Mb)	1.88	2.19	1.57	1.30	2.76	1.64	2.37	2.42	1.80	2.54	3.42	5.75	5.62	2.78	1.85	4.10	4.09	2.35	4.26	2.83	4.00	2.81	3.71	2.62	2.47	3.84	5.60	2.09	3.78	2.64	2.26	3.72	3.42	2.68	3.92	2.48	1.70	5.80	3.20	3.34	4.39	1.68	2.88	1.68	2.04	3.76	2.29	2.22	2.19
[flank] Fraction of flank Data in all data	0.45%	0.45%	0.43%	0.43%	0.45%	0.43%	0.45%	0.42%	0.45%	0.51%	0.56%	0.63%	0.67%	0.49%	0.51%	0.49%	0.51%	0.51%	0.52%	0.49%	0.53%	0.59%	0.55%	0.48%	0.47%	0.51%	0.88%	0.48%	0.52%	0.44%	0.48%	0.51%	0.45%	0.47%	0.53%	0.45%	0.51%	0.56%	0.52%	0.51%	0.52%	0.52%	0.50%	0.44%	0.47%	0.47%	0.44%	0.47%	0.47%
[flank] Fraction of flank Data in mapped data	0.46%	0.46%	0.43%	0.43%	0.45%	0.43%	0.45%	0.43%	0.45%	0.51%	0.57%	0.63%	0.68%	0.50%	0.52%	0.50%	0.52%	0.52%	0.53%	0.50%	0.53%	0.60%	0.55%	0.48%	0.47%	0.52%	0.89%	0.49%	0.53%	0.45%	0.48%	0.52%	0.46%	0.48%	0.53%	0.45%	0.52%	0.57%	0.53%	0.51%	0.53%	0.53%	0.50%	0.45%	0.48%	0.47%	0.45%	0.47%	0.48%
[flank] Coverage (>0x)	99.56%	97.40%	97.39%	97.59%	98.68%	96.80%	95.87%	97.36%	98.73%	99.07%	98.01%	97.18%	98.56%	96.60%	96.57%	99.31%	99.39%	96.39%	97.62%	99.18%	97.98%	97.77%	96.40%	99.97%	98.10%	98.03%	96.41%	97.54%	97.59%	97.28%	95.31%	98.05%	97.80%	96.79%	98.85%	98.96%	97.92%	98.84%	97.48%	98.24%	99.97%	97.42%	96.83%	98.86%	95.21%	98.53%	99.98%	98.22%	100.00%
[flank] Coverage (>=4x)	93.23%	94.89%	92.22%	89.78%	95.37%	91.55%	93.99%	93.59%	91.27%	94.42%	95.20%	96.47%	95.29%	94.16%	91.46%	97.76%	96.69%	91.54%	96.66%	97.43%	96.19%	93.46%	95.56%	95.04%	93.91%	94.98%	94.88%	93.68%	95.80%	93.25%	91.22%	94.98%	95.70%	95.17%	96.87%	93.53%	90.47%	97.37%	93.73%	94.55%	95.92%	90.08%	93.85%	90.92%	89.75%	95.46%	96.44%	94.60%	97.11%
[flank] Coverage (>=10x)	80.51%	84.39%	73.85%	67.60%	85.22%	69.03%	85.86%	86.32%	75.69%	87.34%	88.85%	92.45%	91.25%	84.82%	77.58%	91.96%	90.01%	79.32%	92.07%	89.83%	89.75%	83.57%	89.36%	84.43%	80.65%	89.62%	82.85%	81.10%	88.23%	83.63%	80.29%	91.93%	92.07%	85.22%	92.96%	83.40%	72.48%	94.30%	86.89%	88.26%	90.26%	65.96%	86.87%	75.03%	81.12%	90.76%	82.95%	79.48%	85.96%
[flank] Coverage (>=30x)	28.61%	37.33%	20.47%	8.08%	50.78%	24.37%	41.82%	41.23%	25.99%	45.52%	57.88%	68.83%	65.62%	48.18%	30.01%	69.56%	67.47%	40.55%	67.93%	50.88%	65.73%	48.15%	60.32%	43.07%	42.64%	64.73%	46.73%	36.21%	65.96%	43.62%	37.65%	62.45%	59.56%	46.15%	65.95%	42.45%	22.88%	77.40%	47.98%	57.37%	68.31%	18.79%	48.27%	23.06%	33.14%	63.32%	35.89%	35.33%	36.07%
[flank] Coverage (>=100x)	0.00%	0.00%	0.00%	0.00%	0.29%	0.00%	0.00%	0.00%	0.00%	0.10%	7.15%	13.45%	9.22%	1.24%	0.00%	8.40%	9.61%	0.00%	13.23%	1.11%	10.57%	2.13%	8.66%	2.44%	0.00%	10.03%	7.31%	0.00%	6.60%	2.47%	0.00%	5.08%	3.24%	1.55%	9.32%	0.40%	0.00%	23.46%	4.47%	4.31%	15.04%	1.73%	2.45%	0.00%	0.00%	6.71%	1.35%	0.00%	0.00%
[truncated: 6 more columns]
