# Supplementary material for: Detection of Structural Variations and Fusion Genes in Breast Cancer Samples Using Third-Generation Sequencing
Source: Front Cell Dev Biol. 2022 Apr 13;10:854640. doi: 10.3389/fcell.2022.854640 (PMC9043247; doi:10.3389/fcell.2022.854640)
Supplement: Supplementary file 4 [file Table1.XLSX]

## Sheet: brca_tsg_hg38
Chr	Start	End	Gene	Length
chr6	151656691	152129619	ESR1	472928
chr14	64084232	64338550	ESR2	254318
chr11	101029624	101130668	PGR	101044
chr7	55019017	55211628	EGFR	192611
chr17	39687914	39730426	ERBB2	42512
chr12	56076799	56103507	ERBB3	26708
chr2	211375717	212539155	ERBB4	1163438
chr3	179148114	179240093	PIK3CA	91979
chr17	43044295	43170245	BRCA1	125950
chr13	32314862	32400266	BRCA2	85404
chr17	75626845	75667191	RECQL5	40346
chr8	144511284	144517845	RECQL4	6561
chr8	31033262	31175916	WRN	142654
chr15	90717327	90816166	BLM	98839
chr5	132556019	132646349	RAD50	90330
chr8	89933336	90003228	NBS1	69892
chr11	94415578	94512185	MRE11	96607
chr14	67819779	68730218	RAD51B	910439
chr17	58692536	58735611	RAD51C	43075
chr17	35092208	35121522	RAD51D	29314
chr11	108222484	108369102	ATM	146618
chr22	28687743	28742422	CHEK2	54679
chr2	214725646	214809711	BARD1	84065
chr17	61679186	61863937	BRIP1	184751
chr9	95099054	95426796	FANCC	327742
chr16	23603160	23641357	PALB2	38197
chr16	68737292	68835542	CDH1	98250
chr17	31007873	31382116	NF1	374243
			Total	5393494
